# Supplementary material for: Network complexity of rubber plantations is lower than tropical forests for soil bacteria but not fungi
Source: Copernicus journal article supplement (doi:10.5194/soil-2021-98), 2021-09-28
Supplement: Supplementary file 1 [file soil-2021-98-supplement.pdf]

1 **Supplementary Information**

2 **Network complexity of rubber plantations is lower than tropical forests for soil**  
3 **bacteria but not fungi**

4 Guoyu Lan<sup>a,b\*</sup>, Chuan Yang<sup>a,b</sup>, Zhixiang Wu<sup>a,b</sup>

5 a. Rubber Research Institute, Chinese Academy of Tropical Agricultural Sciences,  
6 Danzhou City, Hainan Province, 571737, P. R. China;

7 b. Danzhou Investigation & Experiment Station of Tropical Crops, Ministry of  
8 Agriculture and Rural Affairs, Danzhou City, Hainan Province, 571737, P. R.  
9 China

10

11

12 **Figure S1** Rainforest (solid blue hexagons) and rubber plantation (solid red triangles)  
13 study sites on Hainan Island.

14 **Figure S2** Relationship between network properties and OTU abundance of rubber  
15 plantations and tropical rainforest sites across season. The size of the node indicates the  
16 OTU abundance.

17 **Figure S3**  $Z_i$ - $P_i$  plot showing the topological distribution of OTUs in the bacterial  
18 networks. Each point represents a fungal OTU. Threshold values of  $Z_i$  and  $P_i$  for the  
19 classification are 2.5 and 0.62, respectively. The size of the node indicates the OTU  
20 abundance.

21 **Figure S4**  $Z_i$ - $P_i$  plot showing the topological distribution of OTUs in the fungal  
22 networks. Each point represents a fungal OTU. Threshold values of  $Z_i$  and  $P_i$  for the  
23 classification are 2.5 and 0.62, respectively. The size of the node indicates the OTU  
24 abundance.

25 **Figure S5** Network degree of soil bacterial and fungal community of rubber plantations  
26 (blue) and tropical rainforest (red) in dry season and rainy season (A: bacteria in dry  
27 season, B: bacteria in rainy season, C: fungal in dry season, D: fungal in rainy season)

28 **Figure S6** Phylum composition of the soil fungal community of rubber plantations and  
29 tropical rainforest sites across seasons.

30 **Figure S7** Phylum composition of the soil bacterial community of rubber plantations  
31 and tropical rainforest sites across seasons.

32 **Table S1** Site characteristics for rubber plantations and tropical rainforest sites.

33 **Table S2** Soil properties and environmental factors for study rubber plantation and

34 tropical rainforest sites on Hainan Island.

35 **Table S3** Keystone bacterial taxa in the overall network. Keystones were selected on  
36 the basis of high degree, high closeness centrality and low betweenness centrality (for  
37 dry season: cut-off: degree  $> 45$  and CC  $>0.42$  and BC  $<0.030$ , for rainy season: cut-  
38 off: degree  $>72$  and CC  $>0.45$  and BC  $<0.020$ ) according to Berry and Widder (2014).

39 **Table S4** Keystone fungal taxa in the overall network. Keystones were selected on the  
40 basis of high degree, high closeness centrality and low betweenness centrality (for dry  
41 season: cut-off: degree  $>25$  and CC  $>0.25$  and BC  $< 0.06$ , for rainy season: cut-off:  
42 degree  $>30$  and CC  $>0.32$  and BC  $<0.040$ ) according to Berry and Widder (2014).

43

44 **Table S1** Site characteristics for rubber plantations and tropical rainforest sites.

| Forest type       | Site           | Longitude | Latitude | Elevation (m) | Mean annual precipitation (mm) | Mean annual temperature (°C) |
|-------------------|----------------|-----------|----------|---------------|--------------------------------|------------------------------|
| Rubber plantation | Danzhou (DZ)   | 109.5789  | 19.5628  | 112           | 1831.53                        | 23.60                        |
| Rubber plantation | Qiongzong (QZ) | 109.7387  | 19.2633  | 156           | 2067.33                        | 23.45                        |
| Rubber plantation | Ledong (LD)    | 109.2231  | 18.7534  | 170           | 1661.26                        | 24.46                        |
| Rubber plantation | Wanning (WN)   | 110.132   | 18.6749  | 51            | 1786.46                        | 24.7                         |
| Rubber plantation | Haikou (HK)    | 110.5723  | 19.6977  | 102           | 1863.38                        | 24.16                        |
| Rainforest        | Diaoluo (DL)   | 109.864   | 18.7277  | 958           | 1921.27                        | 24.17                        |
| Rainforest        | Jianfeng (JF)  | 108.8834  | 18.7273  | 950           | 1392.34                        | 24.69                        |
| Rainforest        | Bawang (BW)    | 109.1277  | 19.0842  | 575           | 1602.12                        | 24.31                        |
| Rainforest        | Yingge (YG)    | 109.5598  | 19.0467  | 620           | 2067.77                        | 23.55                        |
| Rainforest        | Wuzhi (WZ)     | 109.6812  | 18.9059  | 820           | 2173.82                        | 23.42                        |

45

46

47

**Table S2** Soil properties and environmental factors for rubber plantation and tropical rainforest study sites on Hainan Island.

| Vegetation type   | WC<br>(%)  | SOM<br>(%) | Soil pH   | AN<br>(mg/kg) | NN<br>(mg/kg) | AP<br>(mg/kg) | AK<br>(g/kg) | TN<br>(g/kg) | TP<br>(g/kg) | TK<br>(g/kg) | Elevation<br>(m) | Rainfall<br>(mm) | Temperature<br>(°C) |
|-------------------|------------|------------|-----------|---------------|---------------|---------------|--------------|--------------|--------------|--------------|------------------|------------------|---------------------|
| Rubber plantation | 29.20±9.77 | 1.56±0.88  | 4.79±0.44 | 12.39±6.03    | 7.59±4.31     | 4.03± 3.34    | 29.37±15.35  | 1.28±0.65    | 0.30±0.37    | 13.09±11.24  | 118.20±42.42     | 1841.99±132.49   | 24.07±0.48          |
| Rainforest        | 31.63±9.79 | 2.92±0.90  | 4.59±0.59 | 15.31±5.49    | 13.01±6.75    | 4.13±3.72     | 78.58±39.67  | 2.08±0.94    | 0.18±0.13    | 15.69±7.80   | 784.60±161.68    | 1831.46±293.21   | 24.03±0.48          |

48

49

50 **Table S3** Keystone bacterial taxa in the overall network. Keystones were selected on the basis of high degree, high closeness centrality and low  
51 betweenness centrality (for dry season: cut-off: degree >45 and CC >0.42 and BC <0.030, for rainy season: cut-off: degree >72 and CC >0.45 and  
52 BC <0.020) according to Berry and Widder (2014).

| Forest systems | Season | OTU ID   | Abundance | Genus                        | Phylum          | Betweenness Centrality | Closeness Centrality | Degree |
|----------------|--------|----------|-----------|------------------------------|-----------------|------------------------|----------------------|--------|
| Rubber         | Dry    | OTU7157  | 4249      | norank_o__Acidimicrobiales   | Actinobacteria  | 0.029                  | 0.441                | 50     |
|                |        | OTU12862 | 2526      | norank_c__TK10               | Chloroflexi     | 0.019                  | 0.443                | 48     |
|                |        | OTU11199 | 5405      | norank_o__Acidimicrobiales   | Actinobacteria  | 0.025                  | 0.439                | 47     |
| Rainforest     | Dry    | OTU11388 | 3403      | norank_c__Acidobacteria      | Acidobacteria   | 0.030                  | 0.448                | 50     |
|                |        | OTU13452 | 3618      | Isosphaera                   | Planctomycetes  | 0.028                  | 0.422                | 50     |
|                |        | OTU11373 | 50724     | norank_c__Acidobacteria      | Acidobacteria   | 0.017                  | 0.424                | 47     |
|                |        | OTU12812 | 17787     | Mycobacterium                | Actinobacteria  | 0.028                  | 0.423                | 47     |
|                |        | OTU12831 | 1892      | norank_f__Planctomycetaceae  | Planctomycetes  | 0.019                  | 0.422                | 47     |
| Rubber         | Rainy  | OTU12588 | 2428      | Iamia                        | Actinobacteria  | 0.018                  | 0.498                | 78     |
|                |        | OTU7139  | 1714      | norank_f__Nitrosomonadaceae  | Proteobacteria  | 0.012                  | 0.488                | 76     |
|                |        | OTU8355  | 15140     | norank_f__Nitrosomonadaceae  | Proteobacteria  | 0.008                  | 0.485                | 73     |
| Tropical       | Rainy  | OTU11373 | 45930     | norank_c__Acidobacteria      | Acidobacteria   | 0.019                  | 0.510                | 88     |
|                |        | OTU11421 | 5437      | Candidatus_Xiphinematobacter | Verrucomicrobia | 0.011                  | 0.504                | 79     |
|                |        | OTU2626  | 26970     | norank_c__Acidobacteria      | Acidobacteria   | 0.012                  | 0.497                | 78     |
|                |        | OTU12996 | 8087      | Candidatus_Xiphinematobacter | Proteobacteria  | 0.011                  | 0.501                | 77     |
|                |        | OTU8228  | 6839      | norank_c__Acidobacteria      | Acidobacteria   | 0.011                  | 0.492                | 77     |
|                |        | OTU2133  | 3464      | H16                          | Proteobacteria  | 0.016                  | 0.513                | 76     |
|                |        | OTU11388 | 3390      | norank_c__Acidobacteria      | Acidobacteria   | 0.018                  | 0.508                | 75     |

53 **Table S4** Keystone fungal taxa in the overall network. Keystones were selected on the basis of high degree, high closeness centrality and low  
 54 betweenness centrality (for dry season: cut-off: degree >25 and CC >0.25 and BC < 0.06, for rainy season: cut-off: degree >30 and CC >0.32 and  
 55 BC <0.040) according to Berry and Widder (2014).

| Forest systems | Season | OTU ID  | Abundance | Genus                          | Phylum         | Betweenness Centrality | Closeness Centrality | Degree |
|----------------|--------|---------|-----------|--------------------------------|----------------|------------------------|----------------------|--------|
| Rubber         | Dry    | OTU1965 | 9341      | Clitopilus                     | Basidiomycota  | 0.060                  | 0.290                | 32     |
|                |        | OTU2200 | 6757      | unclassified                   | unclassified   | 0.052                  | 0.289                | 28     |
| Rainforest     | Dry    | OTU7656 | 4373      | unclassified_f__Thelephoraceae | Basidiomycota; | 0.048                  | 0.306                | 26     |
| Rubber         | Rainy  | OTU5009 | 2362      | unclassified                   | unclassified   | 0.022                  | 0.323                | 31     |
|                |        | OTU4781 | 3421      | Mortierella                    | Zygomycota     | 0.1417                 | 0.354                | 30     |
|                |        | OTU5180 | 1719      | unclassified_p__Ascomycota     | Ascomycota     | 0.015                  | 0.321                | 29     |
|                |        | OTU2200 | 5201      | unclassified                   | unclassified   | 0.068                  | 0.337                | 28     |
|                |        | OTU5403 | 1789      | Magnaporthe                    | Ascomycota     | 0.011                  | 0.320                | 28     |
|                |        | OTU5846 | 1485      | unclassified_c__Leotiomycetes  | Ascomycota     | 0.012                  | 0.325                | 27     |
|                |        | OTU4425 | 9770      | unclassified                   | unclassified   | 0.011                  | 0.314                | 27     |
|                |        | OTU4250 | 3463      | unclassified                   | unclassified   | 0.009                  | 0.307                | 27     |
|                |        | OTU6498 | 12083     | unclassified_p__Ascomycota     | Ascomycota     | 0.055                  | 0.296                | 27     |
|                |        | OTU1965 | 5951      | Clitopilus                     | Basidiomycota  | 0.046                  | 0.325                | 26     |
|                |        | OTU5761 | 3945      | unclassified                   | unclassified   | 0.009                  | 0.319                | 26     |
|                |        | OTU5590 | 3691      | unclassified_o__Pleosporales   | Ascomycota     | 0.008                  | 0.317                | 26     |
|                |        | OTU4323 | 5781 5781 | unclassified                   | unclassified   | 0.015                  | 0.309                | 26     |
|                |        | OTU994  | 5828      | unclassified                   | unclassified   | 0.020                  | 0.293                | 26     |
|                |        | OTU4659 | 4215      | unclassified_o__Sordariales    | Ascomycota     | 0.012                  | 0.285                | 26     |
| Rainforest     | Rainy  |         |           |                                |                |                        |                      |        |

|          |      |                                 |              |       |       |    |
|----------|------|---------------------------------|--------------|-------|-------|----|
| OTU10963 | 4510 | Neobulgaria                     | Ascomycota   | 0.032 | 0.205 | 32 |
| OTU11424 | 1413 | unclassified_f__Pezizaceae      | Ascomycota   | 0.032 | 0.205 | 32 |
| OTU10509 | 1200 | unclassified_c__Sordariomycetes | Ascomycota   | 0.040 | 0.204 | 32 |
| OTU10426 | 1105 | unclassified_c__Sordariomycetes | Ascomycota   | 0.025 | 0.024 | 30 |
| OTU11839 | 1086 | unclassified                    | unclassified | 0.035 | 0.204 | 28 |
| OTU3670  | 1181 | Pyrenochaetopsis                | Ascomycota   | 0.036 | 0.204 | 27 |



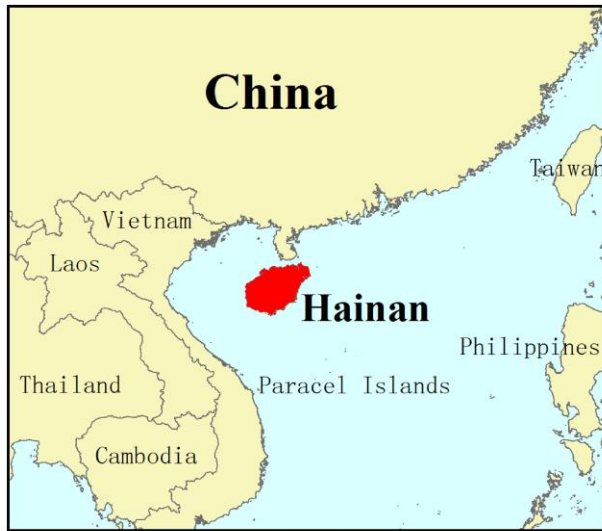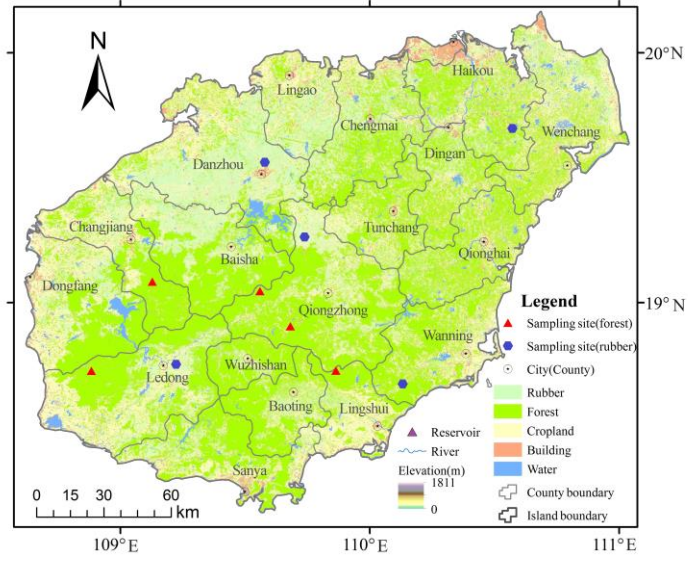

57

58 **Figure S1** Rainforest (blue solid hexagons) and rubber plantation (red solid triangles) study sites

59 on Hainan Island.

60

61

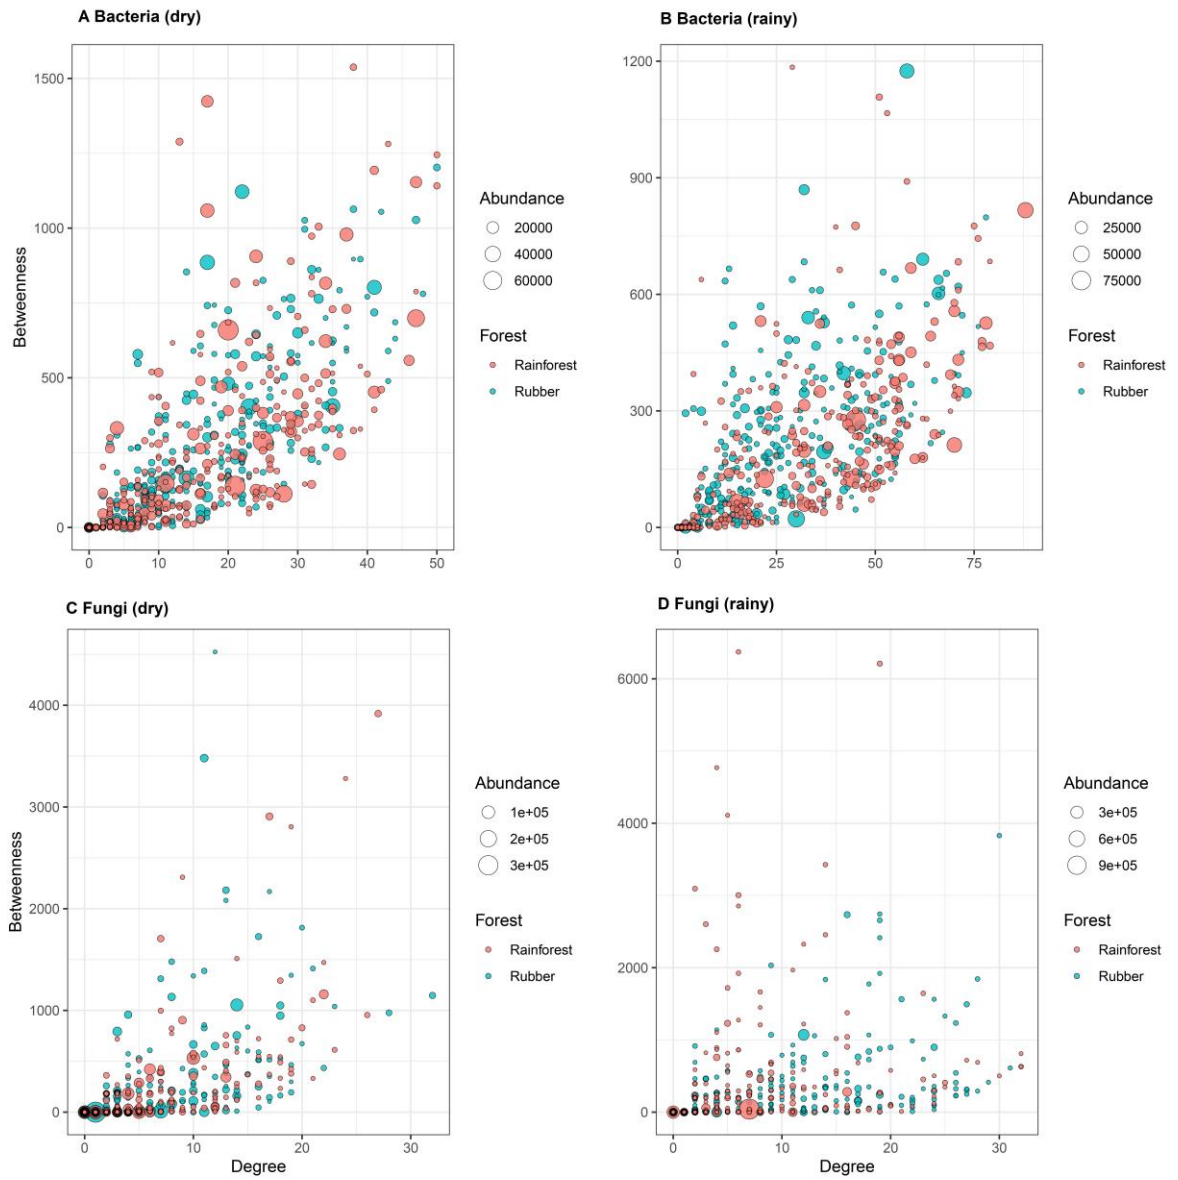

62

63 **Figure S2** Relationship between network properties and OTU abundance of rubber plantations and  
 64 tropical rainforest across season. The size of the node indicates the OTU abundance.

65

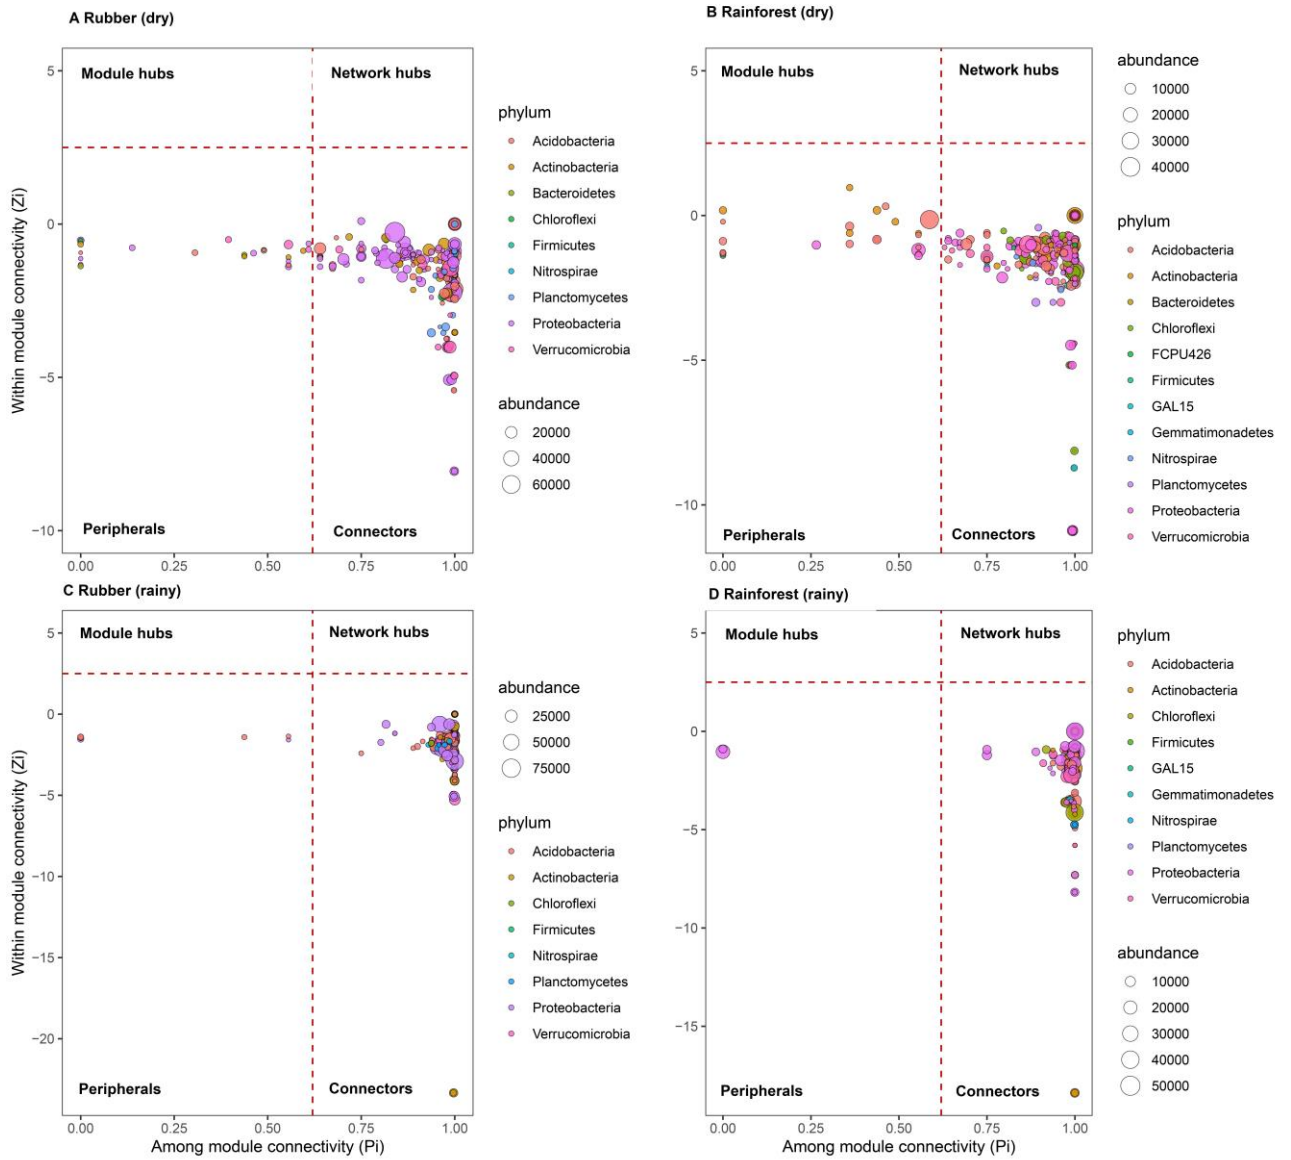

66  
 67  
 68  
 69  
 70  
 71

**Figure S3**  $Z_i, P_i$  plot showing the topological distribution of OTUs in the bacterial networks. Each point represents a fungal OTU. Threshold values of  $Z_i$  and  $P_i$  for classification are 2.5 and 0.62, respectively. The size of the node indicates the OTU abundance.

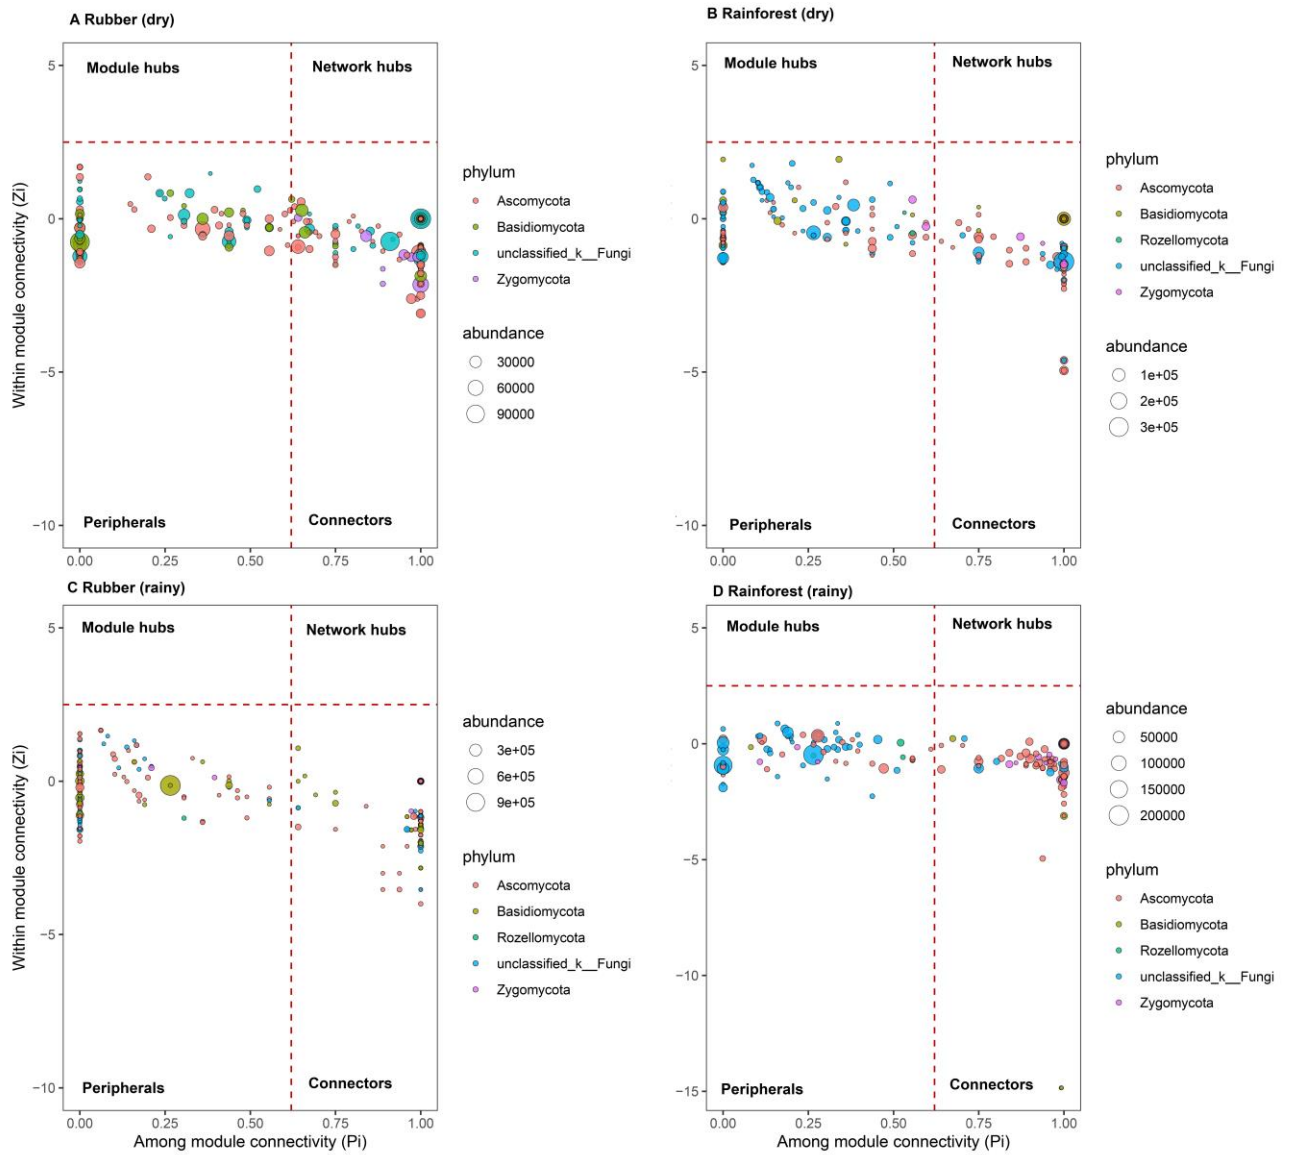

72

73 **Figure S4**  $Z_i$ - $P_i$  plot showing the topological distribution of OTUs in the fungal networks. Each  
 74 point represents a fungal OTU. Threshold values of  $Z_i$  and  $P_i$  for classification are 2.5 and 0.62,  
 75 respectively. The size of the node indicates the OTU abundance.

76

77

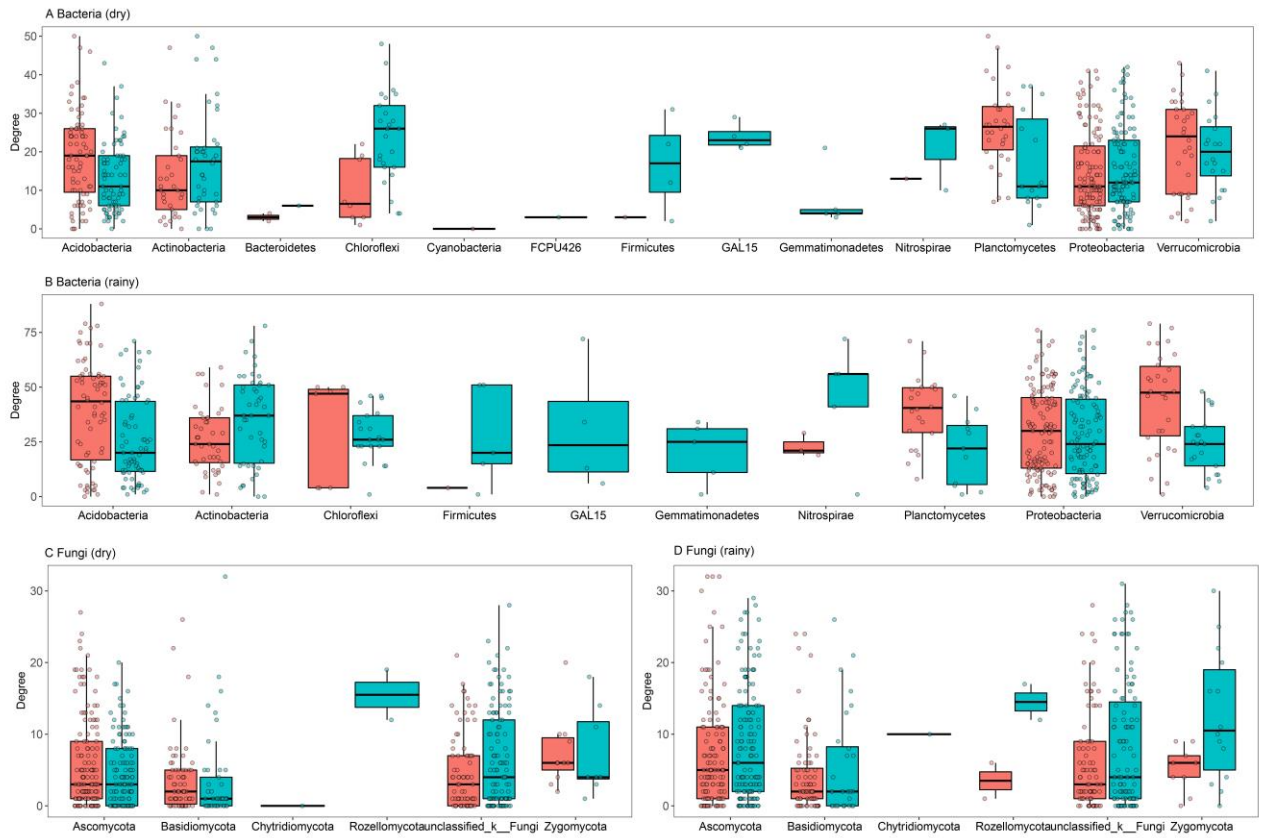

78

79 **Figure S5** Network degree of soil bacterial and fungal community of rubber plantations (blue) and  
 80 tropical rainforest (red) in dry season and rainy season (A: bacteria in dry season, B: bacteria in  
 81 rainy season, C: fungal in dry season, D: fungal in rainy season)

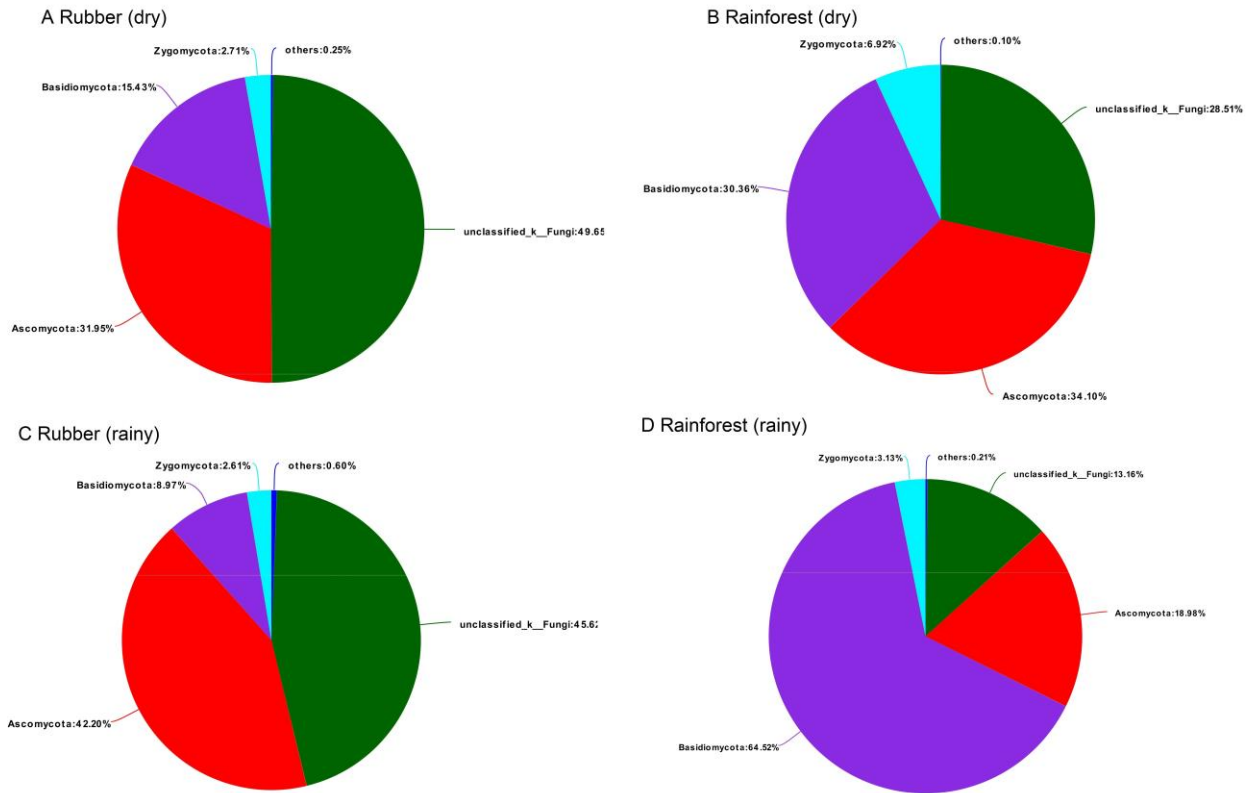

82

83 **Figure S6** Phylum composition of soil fungal community of rubber plantations and tropical  
 84 rainforest across seasons.

85

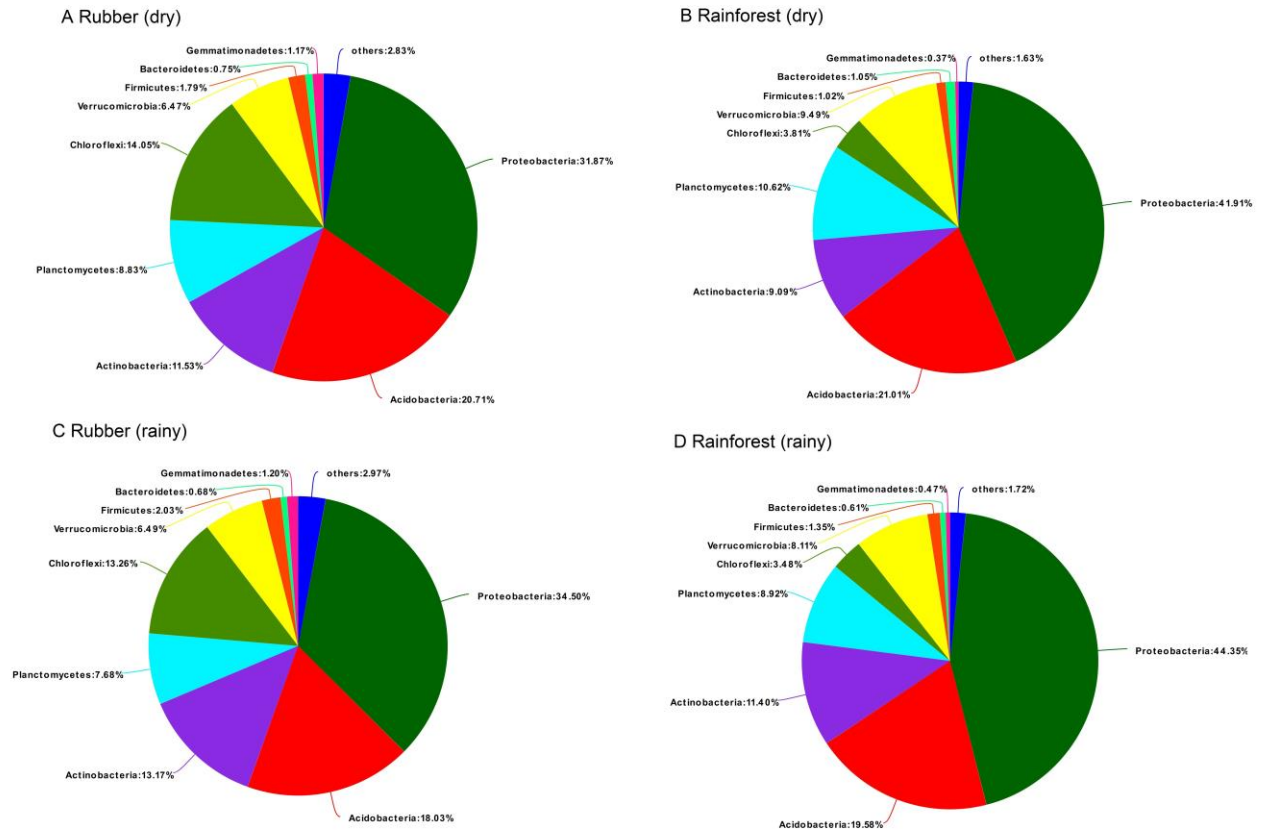

86

87 **Figure S7** Phylum composition of soil bacterial community of rubber plantations and tropical  
 88 rainforest across seasons.
